# Supplementary material for: Chemisorption of silicon tetrachloride on silicon nitride: a density functional theory study
Source: Royal Society of Chemistry journal article supplement (doi:10.1039/d3cp05799b), 2024-01-01
Supplement: d3cp05799b1.pdf [file d3cp05799b1.pdf]

## **Supplementary information**

# **Chemisorption of Silicon Tetrachloride on Silicon Nitride: A Density Functional Theory Study**

Tanzia Chowdhury,<sup>a</sup> Khabib Khumaini,<sup>a,b</sup> Romel Hidayat,<sup>a,c</sup> Hye-Lee Kim,<sup>a,c</sup> Won-Jun Lee<sup>a,c\*</sup>

<sup>a</sup>Department of Nanotechnology and Advanced Materials Engineering, Sejong University, Seoul, 05006, Republic of Korea

<sup>b</sup>Department of Chemistry, Universitas Pertamina, Jl. Teuku Nyak Arief, Simprug, Jakarta 12220, Indonesia

<sup>c</sup>Metal-organic Compounds Materials Research Center, Sejong University, Seoul, 05006, Republic of Korea

\*Corresponding author: [wjlee@sejong.ac.kr](mailto:wjlee@sejong.ac.kr)

Tel: +82-2-3408-3778; fax: +82-2-3408-4342.

Postal address:

Department of Nanotechnology and Advanced Materials Engineering,

Sejong University

209 Neungdong-ro, Gwangjin-gu

Seoul 05006, Republic of Korea

## Bond dissociation energy

Figure S1 shows the bond dissociation energy (BDE) associated with the  $\text{SiCl}_4$  surface reactions described in the main manuscript. The bond dissociation energy was determined using the following equation:

$$\text{BDE} = H^\circ(\text{A}) + H^\circ(\text{B}) - H^\circ(\text{A} - \text{B}) \quad (1)$$

where  $H^\circ$  is the standard absolute enthalpy obtained from the DFT calculation. The details of the BDE calculation method have been discussed in the literature.<sup>1,2</sup> The sample molecules were chosen to represent the environment of the dissociated bond.

| Bond                   | Model schematic                                                                     | BDE (eV) |
|------------------------|-------------------------------------------------------------------------------------|----------|
| Si-Cl                  |   | 4.57     |
| N-H from $\text{NH}_2$ |  | 4.57     |
| N-H from NH            |  | 4.53     |
| H-Cl                   |  | 4.53     |
| Si-N                   |  | 4.82     |
| N-H                    |  | 3.40     |

**Fig. S1** BDE values of bonds associated with the  $\text{SiCl}_4$  surface reaction and the model structure used to calculate them.

## Atomistic structures of reactant states with adjacent NH<sub>2</sub> sites

Figure S2 shows the planar views of the surface sites used in the reactant states **R1**, **R2**, and **R3**, respectively. The NH<sub>2</sub> sites to which the H1, H2, and H3 atoms will migrate to form the NH<sub>3</sub><sup>+</sup>Cl<sup>-</sup> complexes are marked with red circles.

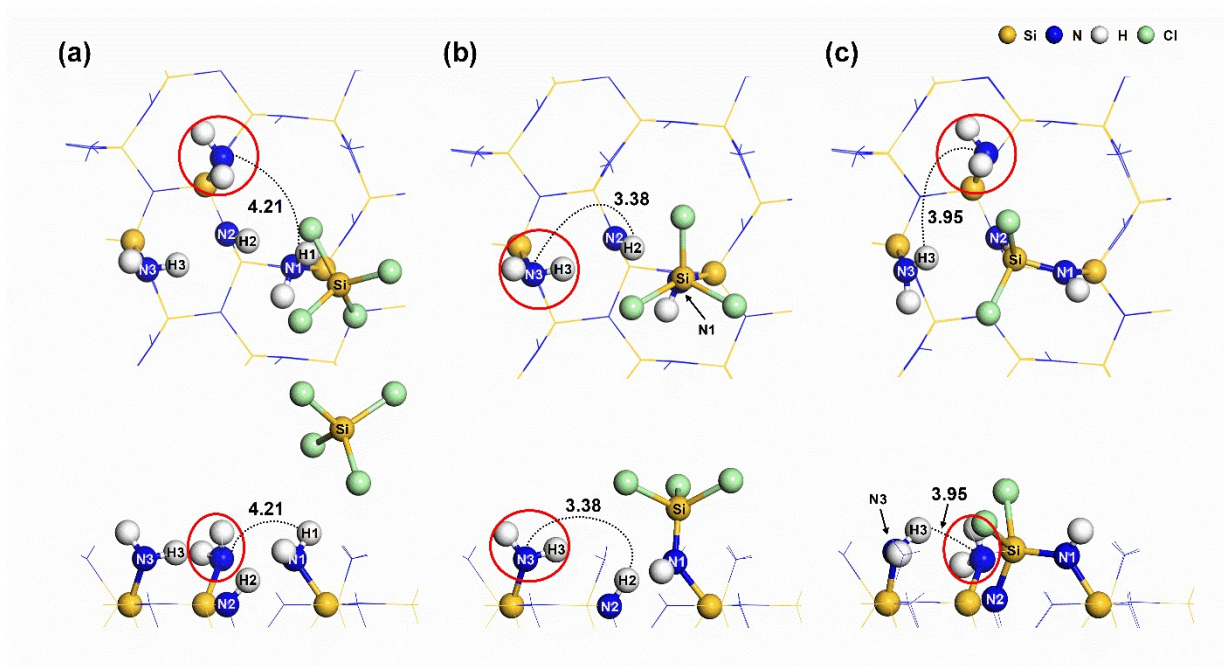

**Fig. S2** The atomistic structures of the reaction sites along with the adjacent NH<sub>2</sub> sites for H atom migration in (a) **R1**, (b) **R2**, and (c) **R3**. A planar view is shown at the top, and the cross-sectional view at the bottom. The dotted lines represent the interatomic distances with corresponding values in Å.

## Atomistic structure showing subsurface bonds

Figure S3 shows the subsurface bonds of the **R2** and **P2** states. The two Si–N<sub>2</sub> subsurface bonds were stretched from 1.72 Å and 1.74 Å in **R2** to 1.79 Å and 1.84 Å in **P2**, respectively.

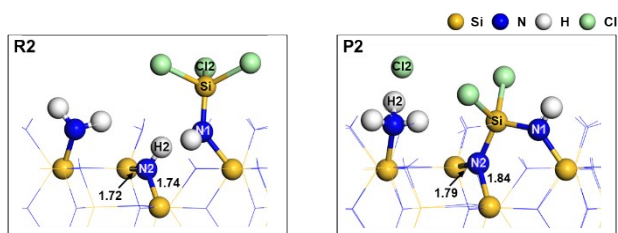

**Fig. S3** The atomistic structure of the reactant (**R2**) and product (**P2**) states showing the Si–N2 subsurface bonds. The bond lengths are shown in Å.

### Mulliken atomic charges for **R2**, **TS2**, **P2**, **R3**, **TS3**, **P3** states

Table S1 and S2 show the change in Mulliken atomic charges for the second and third reactions. The trend remains consistent with the change from **R1** to **P1b**.

Table S1: The Mulliken atomic charges for **R2**, **TS2**, and **P2** states.

| Atom | Mulliken charge (e) |            |           |
|------|---------------------|------------|-----------|
|      | <b>R2</b>           | <b>TS2</b> | <b>P2</b> |
| Si   | 1.310               | 1.375      | 1.419     |
| Cl2  | -0.405              | -0.381     | -0.691    |
| N2   | -1.147              | -1.275     | -1.328    |
| H2   | 0.325               | 0.224      | 0.303     |

Table S2: The Mulliken atomic charges for **R3**, **TS3**, and **P3** states.

| Atom | Mulliken charge (e) |            |           |
|------|---------------------|------------|-----------|
|      | <b>R3</b>           | <b>TS3</b> | <b>P3</b> |
| Si   | 1.410               | 1.467      | 1.461     |
| Cl3  | -0.448              | -0.507     | -0.712    |
| N3   | -0.792              | -1.075     | -1.005    |
| H3   | 0.216               | 0.328      | 0.312     |

## References

- 1 A. K. Chandra and T. Uchimaru, *J. Phys. Chem. A*, 2000, **104**, 9244–9249.
- 2 S. J. Blanksby and G. B. Ellison, *Acc. Chem. Res.*, 2003, **36**, 255–263.
